# Supplementary material
Source: bioRxiv or medRxiv preprint supplement (https://www.biorxiv.org/highwire/filestream/75909/field_highwire_adjunct_files/4/241760-5.pdf)

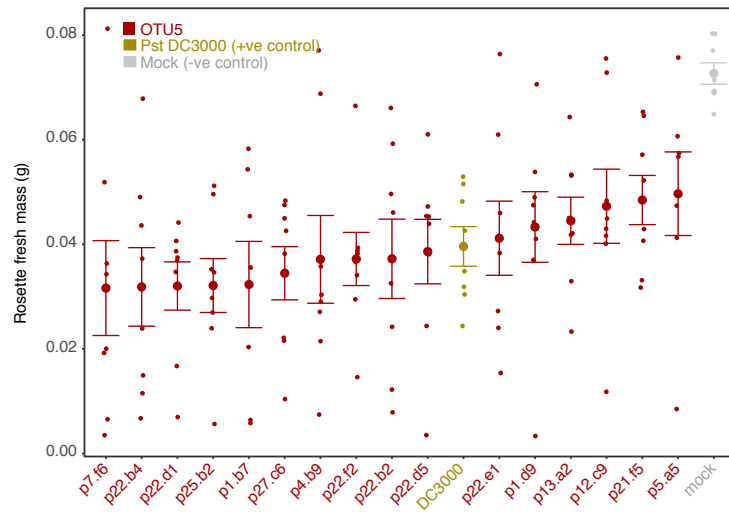

Supplement: Supplementary file [file 241760-5.pdf]
